# Supplementary material for: Lithium Salt Catalyzed Ring-Opening Polymerized Solid-State Electrolyte with Comparable Ionic Conductivity and Better Interface Compatibility for Li-Ion Batteries
Source: MDPI journal article supplement (doi:10.3390/membranes12030330), 2022-03-16
Supplement: s1 [file s1]

Supplementary Materials

# Lithium Salt Catalyzed Ring-Opening Polymerized Solid-State Electrolyte with Comparable Ionic Conductivity and Better Interface Compatibility for Li-Ion Batteries

Wei Zhang <sup>1</sup>, Sujin Yoon <sup>1</sup>, Lei Jin <sup>1</sup>, Hyunmin Lim <sup>1</sup>, Minhyuk Jeon <sup>1</sup>, Hohyoun Jang <sup>1</sup>, Faiz Ahmed <sup>2</sup> and Whangi Kim <sup>1,\*</sup>

<sup>1</sup> Department of Applied Chemistry, Konkuk University, Chungju 27478, Korea; arno\_zw@hotmail.com (W.Z.); ysj920126@naver.com (S.Y.); jinlei8761@naver.com (L.J.); tree3367@naver.com (H.L.); jeonminh97@naver.com (M.J.); 201417450@kku.ac.kr (H.J.)

<sup>2</sup> Grenoble INP, LEPMI, University of Grenoble Alpes, 38000 Grenoble, France; faiz2310@gmail.com

\* Correspondence: wgkim@kku.ac.kr

**Citation:** Zhang, W.; Yoon, S.; Jin, L.; Lim, H.; Jeon, M.; Jang, H.; Ahmed, F. Lithium Salt Catalyzed Ring-Opening Polymerized Solid-State Electrolyte with Comparable Ionic Conductivity and Better Interface Compatibility for Li-Ion Batteries. *Membranes* **2022**, *12*, 330. <https://doi.org/10.3390/membranes12030330>

Academic Editor: Giovanni Battista Appetecchi

Received: 9 February 2022

Accepted: 10 March 2022

Published: 16 March 2022

**Publisher's Note:** MDPI stays neutral with regard to jurisdictional claims in published maps and institutional affiliations.

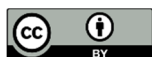

**Copyright:** © 2022 by the authors. Licensee MDPI, Basel, Switzerland. This article is an open access article distributed under the terms and conditions of the Creative Commons Attribution (CC BY) license (<https://creativecommons.org/licenses/by/4.0/>).

**Table S1.** The explanation of main abbreviation words and used in this article.

| Abbreviation     | Full Name                                   |
|------------------|---------------------------------------------|
| LiFSI            | lithium bis(fluorosulfonyl)imide            |
| FTIR             | Fourier transform infrared                  |
| $^1\text{H-NMR}$ | Proton nuclear magnetic resonance           |
| FE-SEM           | Field emission scanning electron microscopy |
| EIS              | Electrochemical impedance spectroscopy      |
| LSV              | Linear sweep voltammetry                    |
| GPEs             | Gel polymer electrolytes                    |
| SPEs             | Solid-state polymer electrolytes            |
| CROP             | Cationic ring-opening polymerization        |
| EOM              | 3-ethyl-3-oxetanemethanol                   |
| CV               | Cyclic voltametric                          |
| $t_{\text{Li}}$  | Li-ion transference number                  |
| ESW              | Electrochemical stability window            |
| CD               | charge-discharge                            |
| Csp              | discharge specific capacity                 |
| $\eta$           | coulombic efficiency                        |

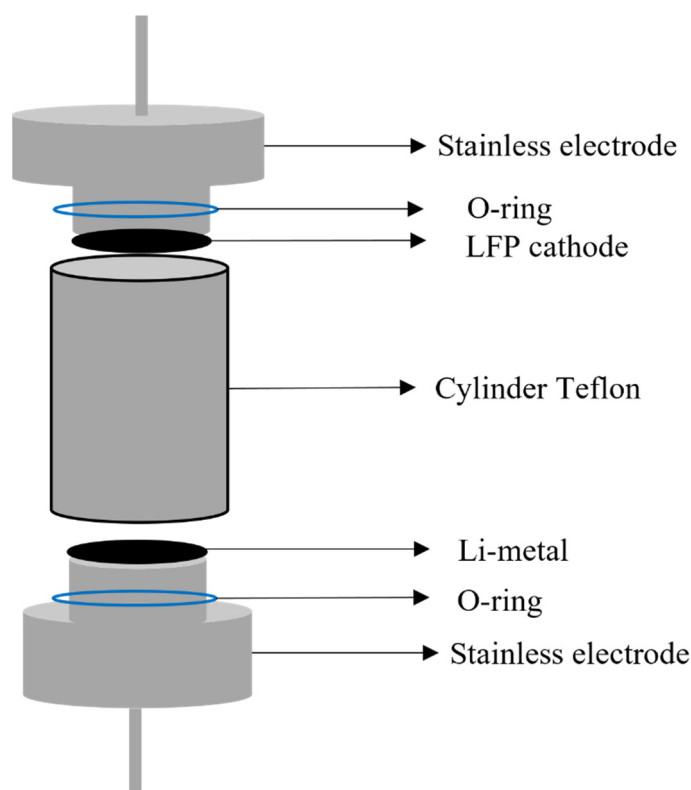**Figure S1.** Configuration of symmetry Swagelok cell.

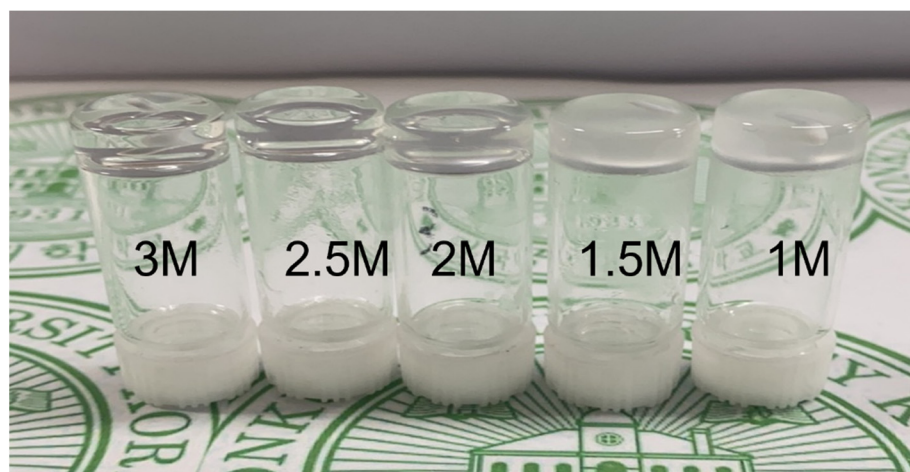

Figure S2. Photographing of varied concentrated LiFSI with EOM after 54 hrs.

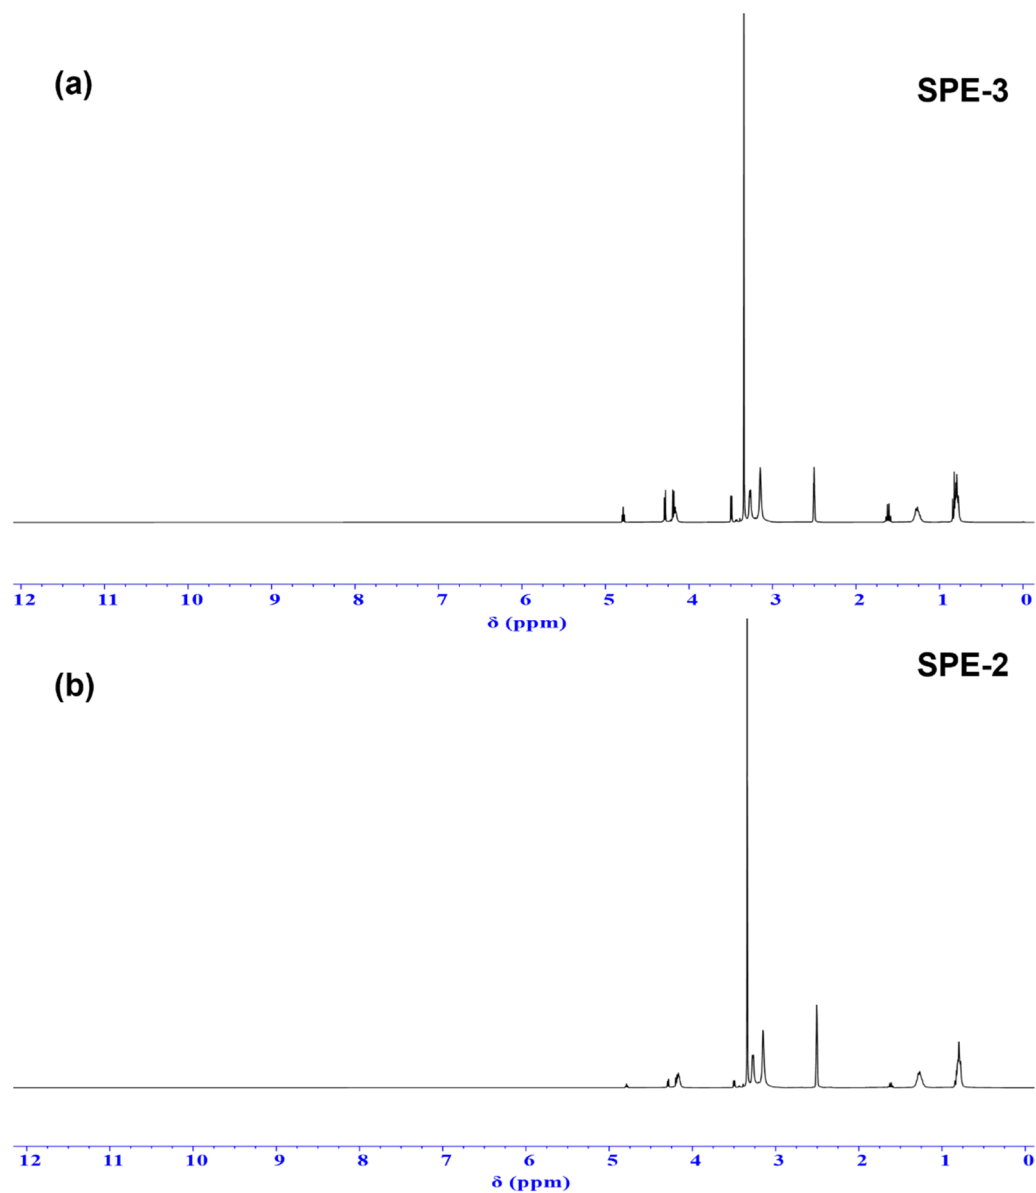

Figure S3. <sup>1</sup>H-NMR spectrum of SPE-3(a) and SPE-2(b).

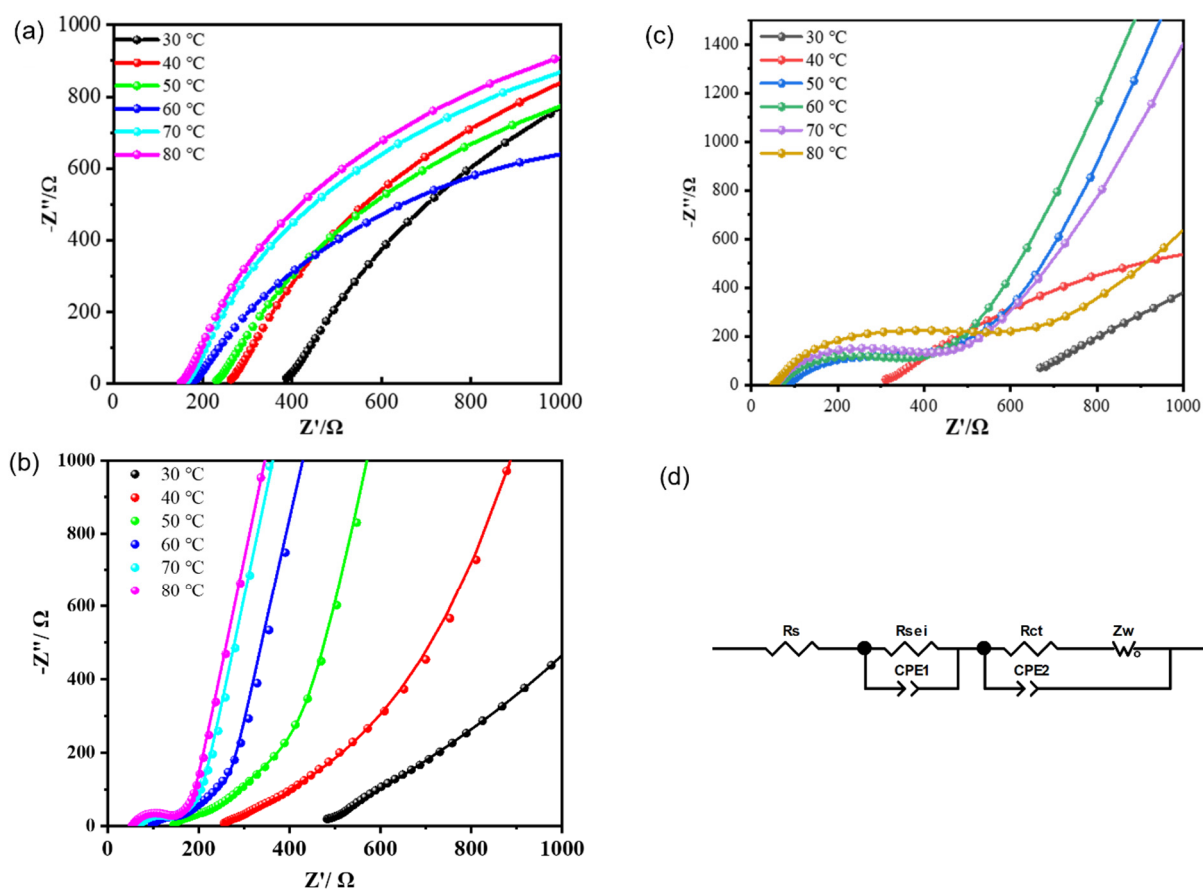

Figure S4. Nyquist curves of SPE-2(a), SPE-2.5(b) with fitting plots, and SPE-3(c); equivalent circuit (d).

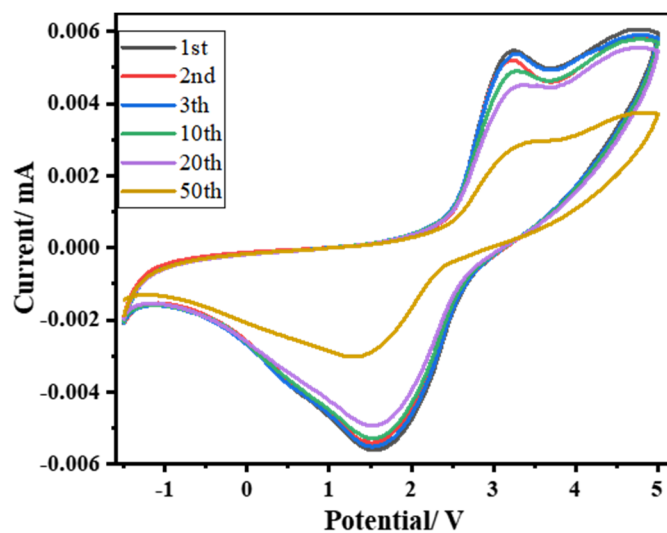

Figure S5. CV sweeping 50 cycles of SPE-2.5 electrolyte with the dummy cell over the potential range from  $-1.5$  to  $5$  V, scan rate at  $25$  mV/s.

Table S2. Analytical parameters for the calculation of  $t_{Li+}$  of SPE-2.5.

| $\Delta U$ (V) | $I_0$ ( $\mu A$ ) | $I_s$ ( $\mu A$ ) | $R_0$ ( $\Omega$ ) | $R_s$ ( $\Omega$ ) | $t_{Li+}$ |
|----------------|-------------------|-------------------|--------------------|--------------------|-----------|
| 0.01           | 2.92              | 2.13              | 160                | 225                | 0.75      |

**Table S3.** Comparison of properties of polymer electrolyte reported based on ring-opening polymerization.

| Components        | Salt/Pasticizer/Solvent   | $\sigma$<br>(mS/cm) <sup>a</sup> | $t_{Li^+}$ <sup>b</sup> | Stability vs<br>(Li <sup>+</sup> /Li) (V) and<br>Cathode | Ref.      |
|-------------------|---------------------------|----------------------------------|-------------------------|----------------------------------------------------------|-----------|
| PEO               | LiTFSI/no/ACN             | 0.0004                           | 0.4                     | 4.8                                                      | [1]       |
| DGEPEG, PEGDA     | LiTFSI/no/no              | 0.053                            | N/A                     | 4.7, LFP                                                 | [2]       |
| POSS, P(EO-co-PO) | LiTFSI/ no/THF            | 0.11                             | 0.62                    | 5.4, LFP                                                 | [3]       |
| GLYMO, EDGE       | LiTFSI/no/Ethanol         | 0.026                            | 0.37                    | 4.9, LTO                                                 | [4]       |
| GLYMO, DGEPEG     | LiClO <sub>4</sub> /no/no | 0.12                             | N/A                     | N/A                                                      | [5]       |
| SPE-2.5           | LiFSI/no/no               | 0.45                             | 0.75                    | 3.75, LFP                                                | This work |

<sup>a</sup> at 25 °C<sup>b</sup> All lithium cation transference numbers ( $t_{Li^+}$ ) reported in Table S2 were measured using the Bruce-Vincent method.

acetonitrile (ACN), tetrahydrofuran (THF), lithium bis(trimethanesulfonyl)imide (LiTFSI), LiFePO<sub>4</sub>-LFP, Ni<sub>1/3</sub>Mn<sub>1/3</sub>Co<sub>1/3</sub>O<sub>2</sub>-NMC, Li<sub>4</sub>Ti<sub>5</sub>O<sub>12</sub>(LTO), Poly (ethylene oxide) (PEO), Diglycidylether of polyethylene glycol (DGEPEG), Poly (ethylene glycol) diacrylate (PEGDA), Polyhedral oligomeric silsesquioxane (POSS), Poly (ethylene-co-propylene oxide) (P (EO-co-PO)), (3-glycidyloxypropyl) trimethoxy silane (GLYMO), Ethyl glycol diglycidyl ether (EDGE),.

## References

- Cheng, H.; Zhu, C.; Huang, B.; Lu, M.; Yang, Y. Synthesis and electrochemical characterization of PEO-based polymer electrolytes with room temperature ionic liquids. *Electrochim. Acta* **2007**, *52*, 5789–5794. doi: 10.1016/j.electacta.2007.02.062.
- Duan, H.; Yin, Y.X.; Zeng, X.X.; Li, J.Y.; Shi, J.L.; Shi, Y.; Wen, R.; Guo, Y.G.; Wan, L.J. In situ plasticized polymer electrolyte with double-network for flexible solid-state lithium-metal batteries. *Energy Storage Mater.* **2018**, *10*, 85–91. doi: 10.1016/j.ensm.2017.06.017.
- Hsu, S.T.; Tran, B.T.; Subramani, R.; Nguyen, H.T.T.; Rajamani, A.; Lee, M.Y.; Hou, S.S.; Lee, Y.L.; Teng, H. Free-standing polymer electrolyte for all-solid-state lithium batteries operated at room temperature. *J. Power Sources* **2020**, *449*, 227518. doi: 10.1016/j.jpowsour.2019.227518.
- Vélez, J.F.; Aparicio, M.; Mosa, J. Covalent silica-PEO-LiTFSI hybrid solid electrolytes via sol-gel for Li-ion battery applications. *Electrochim. Acta* **2016**, *213*, 831–841. doi: 10.1016/j.electacta.2016.07.146.
- Popall, M.; Andrei, M.; Kappel, J.; Kron, J.; Olma, K.; Olsowski, B. ORMOCERs as inorganic-organic electrolytes for new solid state lithium batteries and supercapacitors. *Electrochim. Acta* **1998**, *43*, 1155–1161. doi: 10.1016/S0013-4686(97)10014-7.
